# Supplementary material
Source: PubMed Central journal article supplement (PMC5101130)
Supplement: NIHMS812075-supplement-1.pdf [file NIHMS812075-supplement-1.pdf]

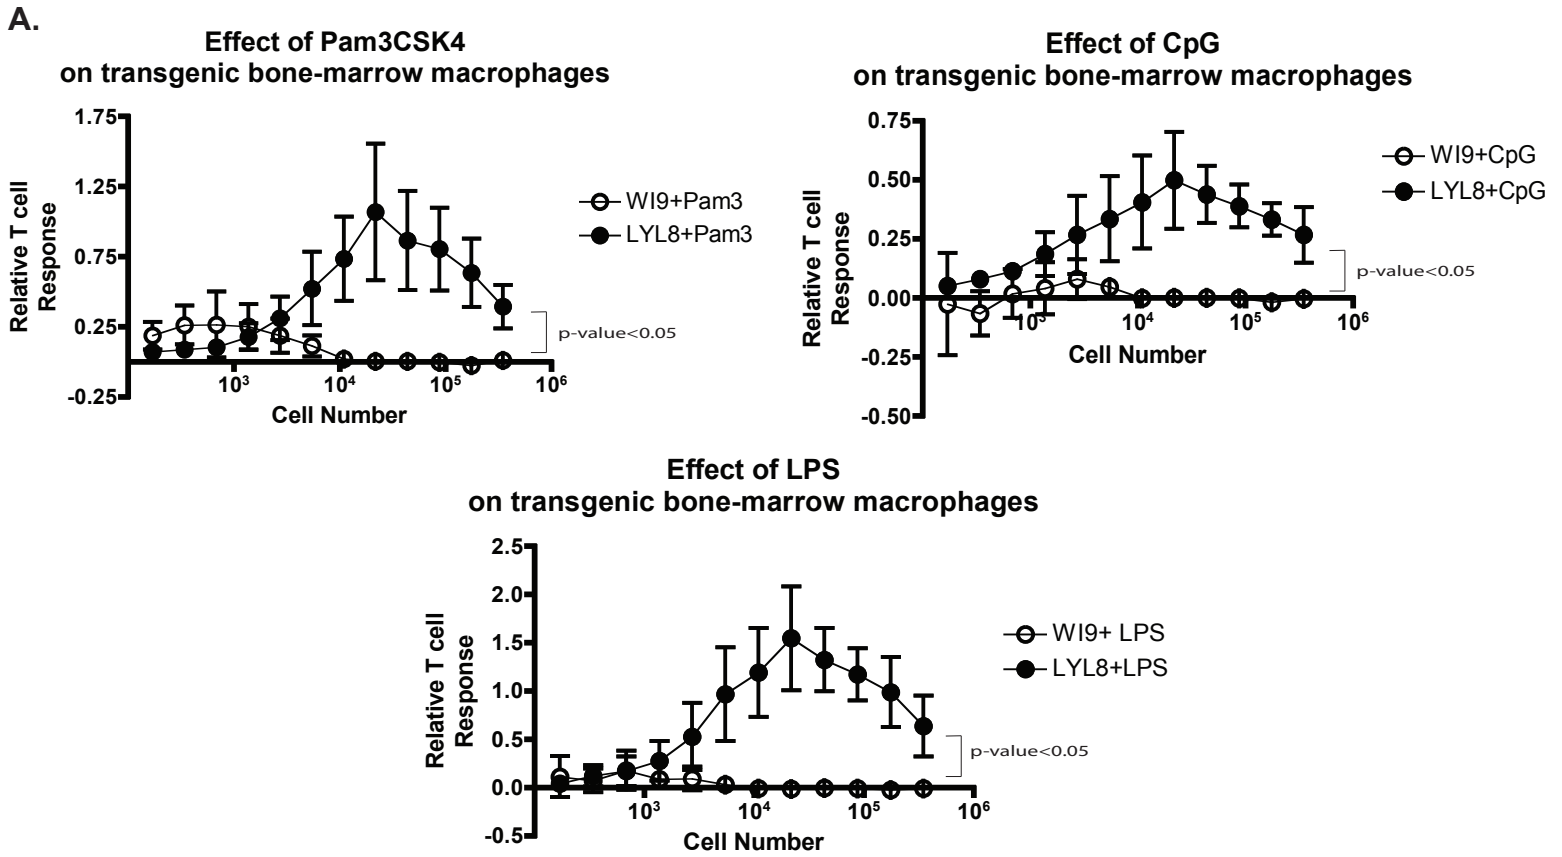

**B.**

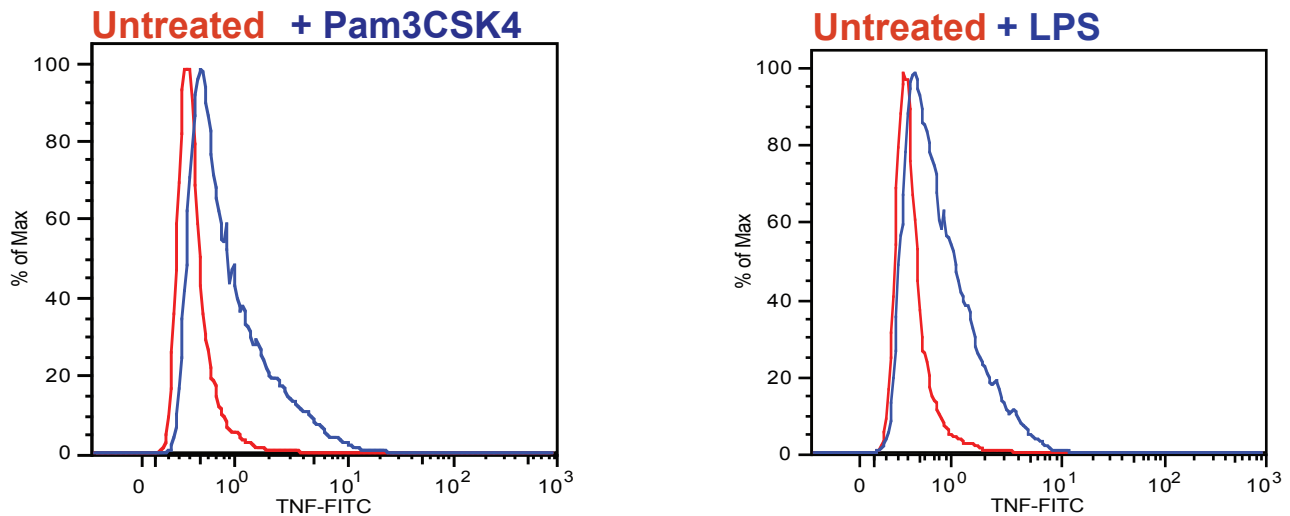

**Fig S1 A: Relative T-cell responses to the cryptic peptide are significantly enhanced upon TLR-ligand stimulation, compared to the conventional peptide.** T-cell responses to the WI9 and LYL8 peptides, upon Pam3CSK4, CpG, LPS, stimulation, were normalized to that of the untreated samples for 3 distinct experiments. An unpaired t-test (with Welch's correction) was performed, comparing the conventional and cryptic peptide responses. p-value < 0.05

**B: Toll-like receptor agonists stimulated TNF- $\alpha$  production in macrophages:** Primary macrophages from the WI9.LYL8 mice were stimulated with either LPS (1 $\mu$ g/mL) or Pam3CSK4 (1 $\mu$ g/mL) for a period of 6 hours, after which the macrophages were stained intracellularly for TNF- $\alpha$  and analyzed by flow cytometry.

A i.

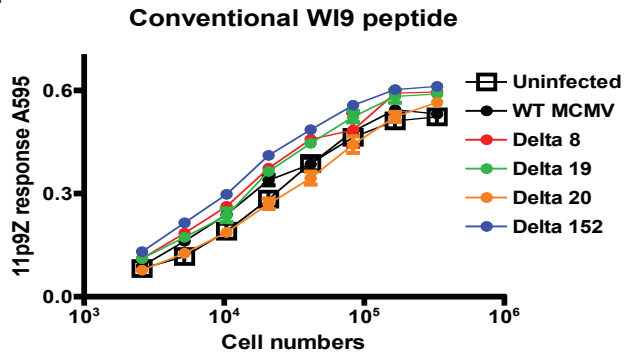

ii.

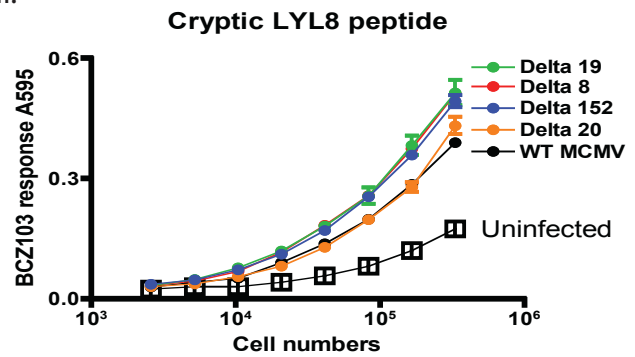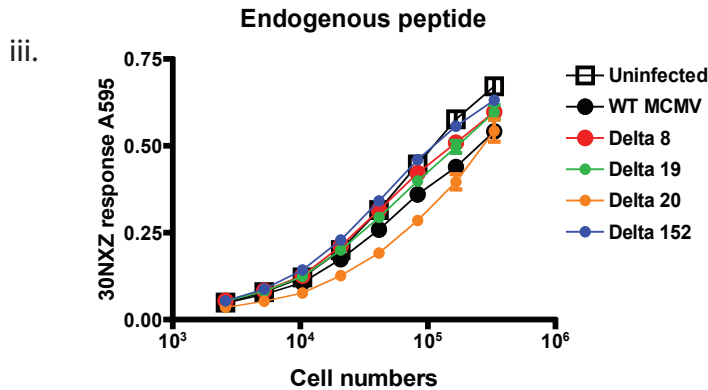

**Fig S2A: Infection with various MCMV deletion mutants also enhances cryptic peptide presentation:**

WI9.LYL8 macrophages were infected wild-type MCMV and MCMV mutants lacking multiple open-reading frames of the MCMV genome. The mutant Delta 152 indicates that it lacks the m152 gene that encodes for MHC Class I inhibitors. The cells were harvested and incubated with either the 11p9Z, BCZ103 or the 30NXZ hybridoma that is specific for an endogenous peptide. Data is representative of 2 independent experiments.

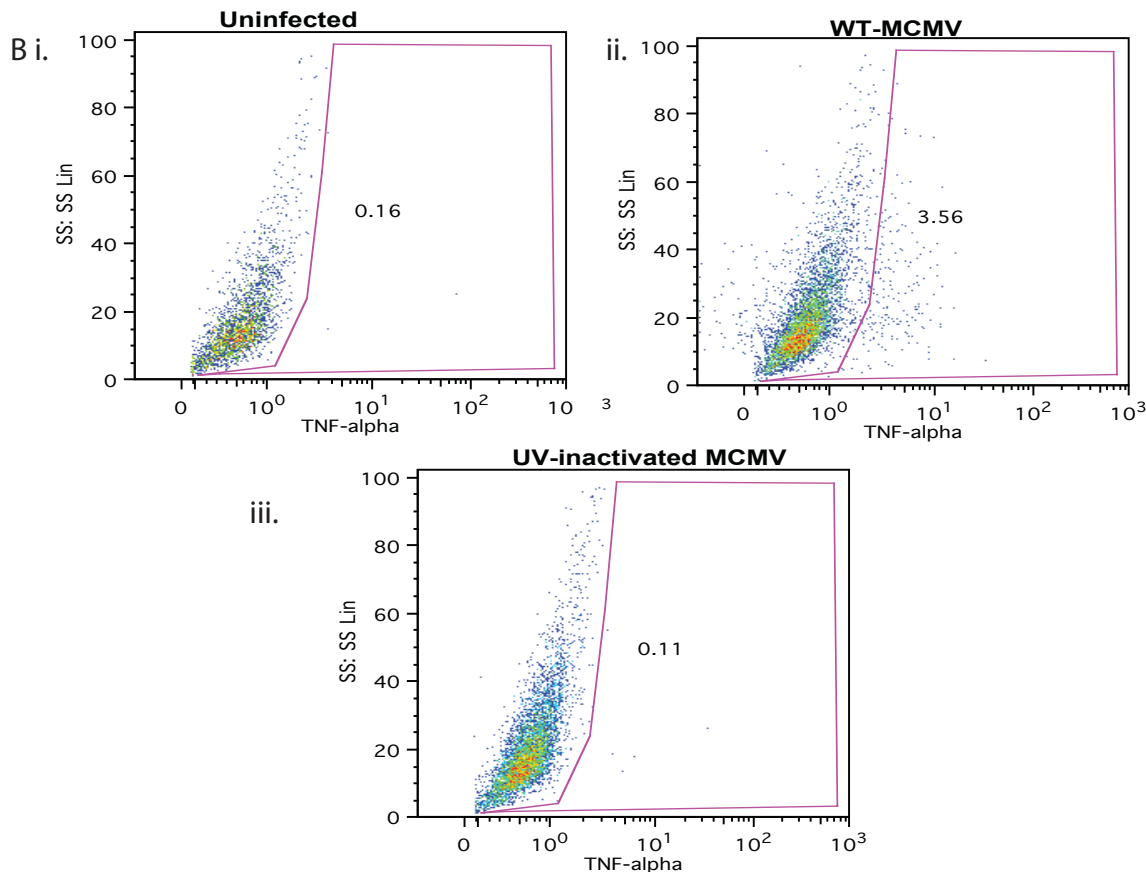

**Fig S2B: UV-inactivated MCMV does not induce inflammatory cytokine production in macrophages:** Uninfected and MCMV infected macrophages were stained intracellularly with TNF- $\alpha$  antibody and analyzed by flow cytometry. Data is representative of 3 experiments.

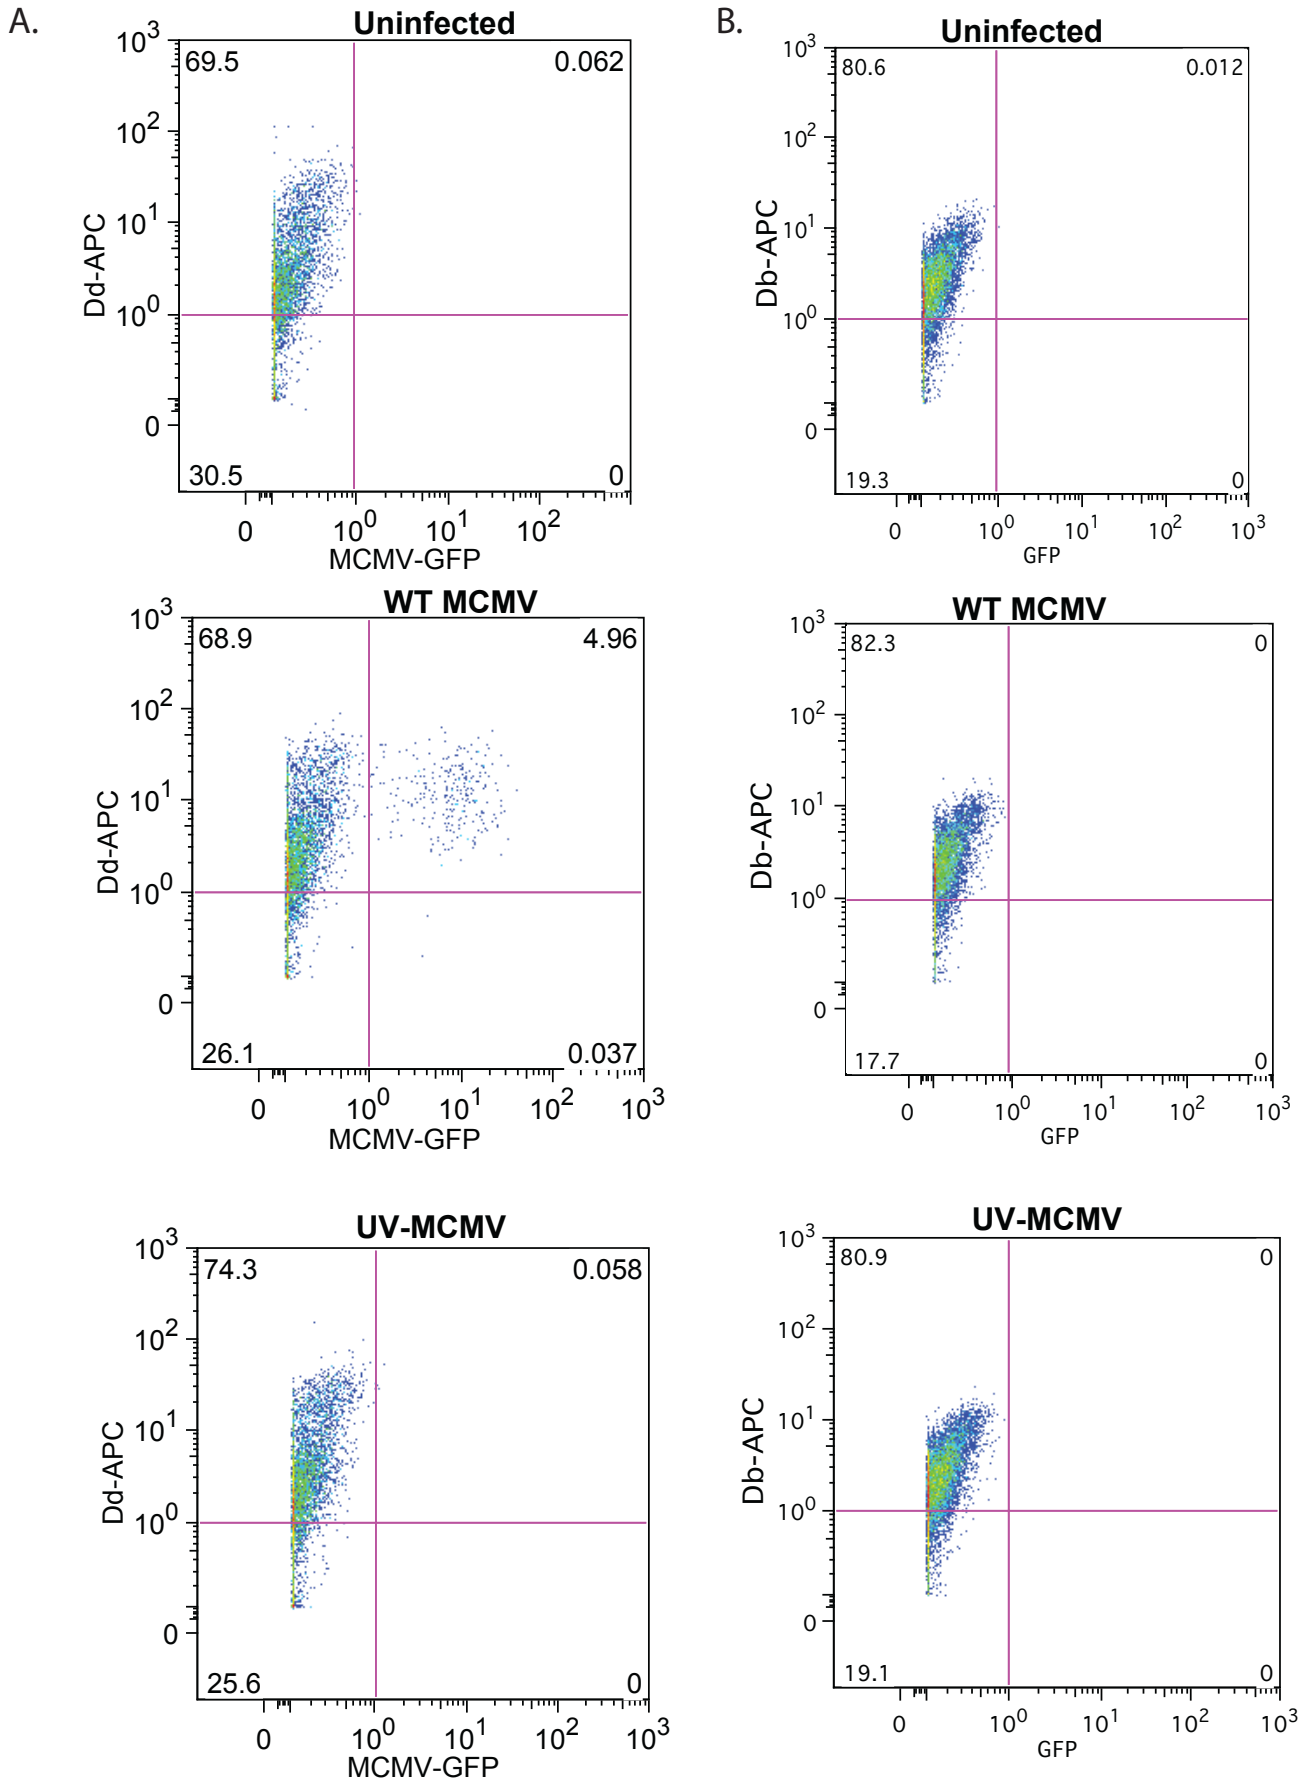

**Fig S3: Enhancement of cryptic peptide presentation does not require direct virus infection** A. H2d macrophages infected with MCMV-GFP stained with Dd antibody. B. WI9.LYL8 macrophages were stained with a Db antibody and visualized for GFP expression by flow cytometry. Data is representative of 3 experiments.

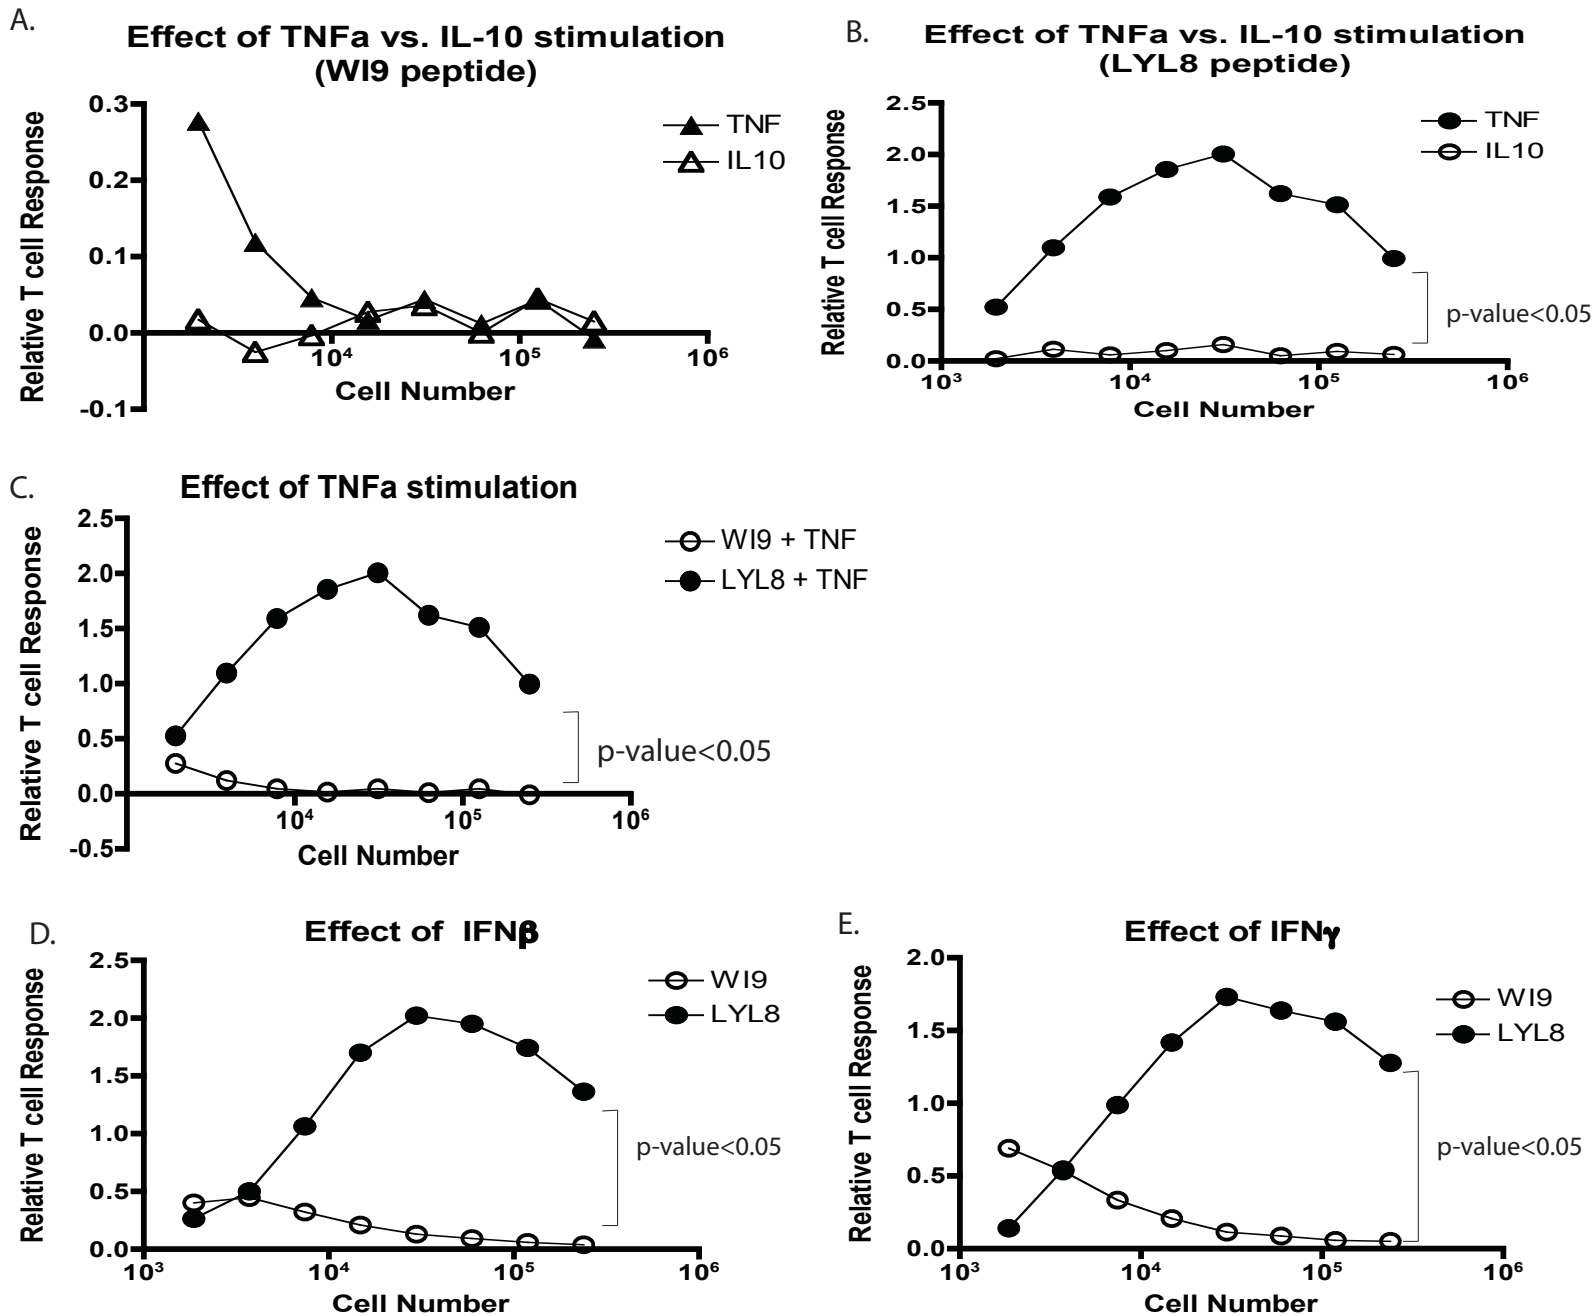

**Fig S4 . Relative T-cell responses to the cryptic peptide are significantly enhanced upon inflammatory cytokine stimulation, compared to the conventional peptide.** T-cell responses to the WI9 and LYL8 peptides, upon TNF $\alpha$ , IL-10 and IFN $\beta$  and IFN $\gamma$  stimulation, were normalized to that of the untreated samples for 3 distinct experiments. An unpaired t-test (with Welch's correction) was performed, comparing the 2 variables. p-value<0.05
